# Supplementary material for: Fragon: rapid high-resolution structure determination from ideal protein fragments
Source: PubMed Central journal article supplement (PMC5947761; doi:10.1107/s2059798318002292), 2018-03-02
Supplement: d-74-00205-sup1.pdf [file d-74-00205-sup1.pdf]

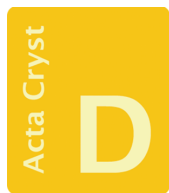

STRUCTURAL  
BIOLOGY

**Volume 74 (2018)**

**Supporting information for article:**

***Fragon*: rapid high-resolution structure determination from ideal protein fragments**

**Huw T. Jenkins**

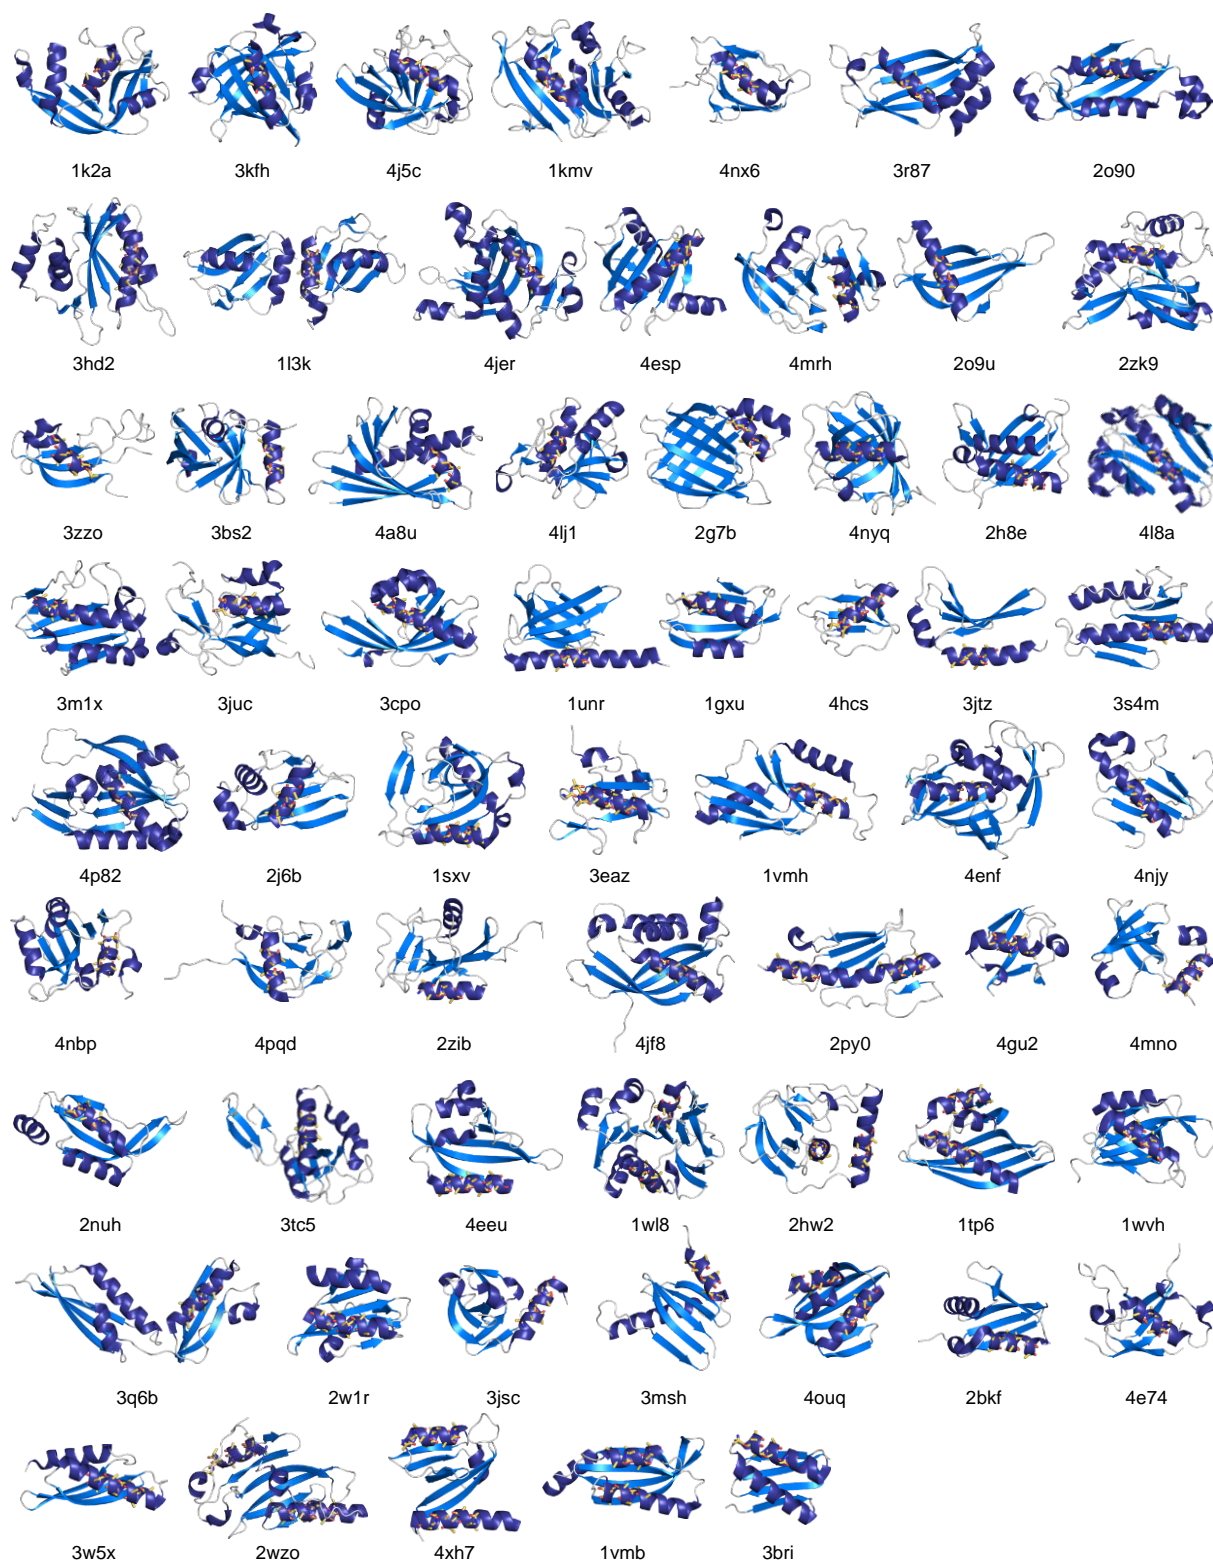

**Figure S1** Test cases in the mixed  $\alpha/\beta$  test set solved by *Fragon*. The fragment placed by *Phaser* is shown as yellow sticks.

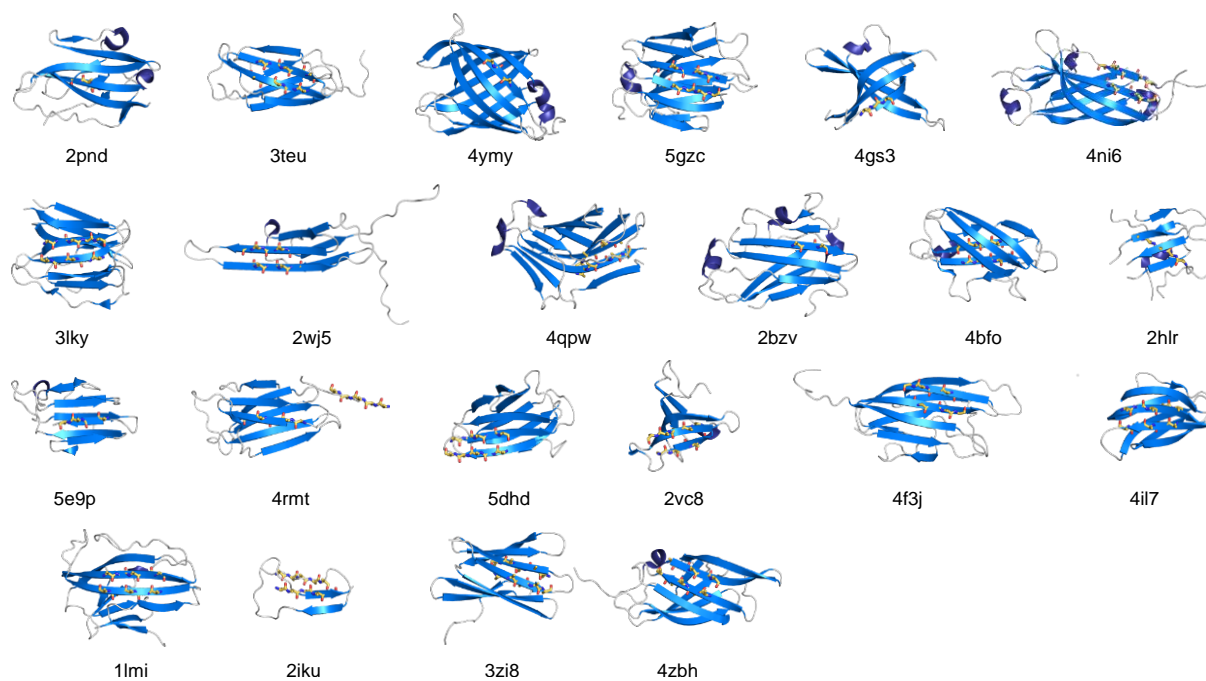

**Figure S2** Test cases in the all- $\beta$  test set solved by *Fragon*. The fragment placed by *Phaser* is shown as yellow sticks.
